CORRECTION

# Correction: Efficient Removal of $\text{Co}^{2+}$ from Aqueous Solution by 3-Aminopropyltriethoxysilane Functionalized Montmorillonite with Enhanced Adsorption Capacity

Zhujian Huang, Pingxiao Wu, Beini Gong, Yaping Dai, Pen-Chi Chiang, Xiaolin Lai, Guangwei Yu

In the Funding section, the grant numbers from the National Science Foundation of China are listed incorrectly. The correct grant numbers are: 41273122, 41472038, 51509093.

## Reference

1. Huang Z, Wu P, Gong B, Dai Y, Chiang P-C, Lai X, et al. (2016) Efficient Removal of  $\text{Co}^{2+}$  from Aqueous Solution by 3-Aminopropyltriethoxysilane Functionalized Montmorillonite with Enhanced Adsorption Capacity. PLoS ONE 11(7): e0159802. doi: [10.1371/journal.pone.0159802](https://doi.org/10.1371/journal.pone.0159802) PMID: [27448094](https://pubmed.ncbi.nlm.nih.gov/27448094/)

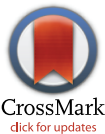

## OPEN ACCESS

**Citation:** Huang Z, Wu P, Gong B, Dai Y, Chiang P-C, Lai X, et al. (2016) Correction: Efficient Removal of  $\text{Co}^{2+}$  from Aqueous Solution by 3-Aminopropyltriethoxysilane Functionalized Montmorillonite with Enhanced Adsorption Capacity. PLoS ONE 11(9): e0164219. doi:10.1371/journal.pone.0164219

**Published:** September 29, 2016

**Copyright:** © 2016 Huang et al. This is an open access article distributed under the terms of the [Creative Commons Attribution License](https://creativecommons.org/licenses/by/4.0/), which permits unrestricted use, distribution, and reproduction in any medium, provided the original author and source are credited.
